# Supplementary material for: Fluoroponytailed ionic liquids as co-porogens for poly(butyl methacrylate-co-ethylene dimethacrylate) monolithic supports for thin layer chromatography
Source: Royal Society of Chemistry journal article supplement (doi:10.1039/d1an02005f), 2022-01-01
Supplement: d1an02005f1.pdf [file d1an02005f1.pdf]

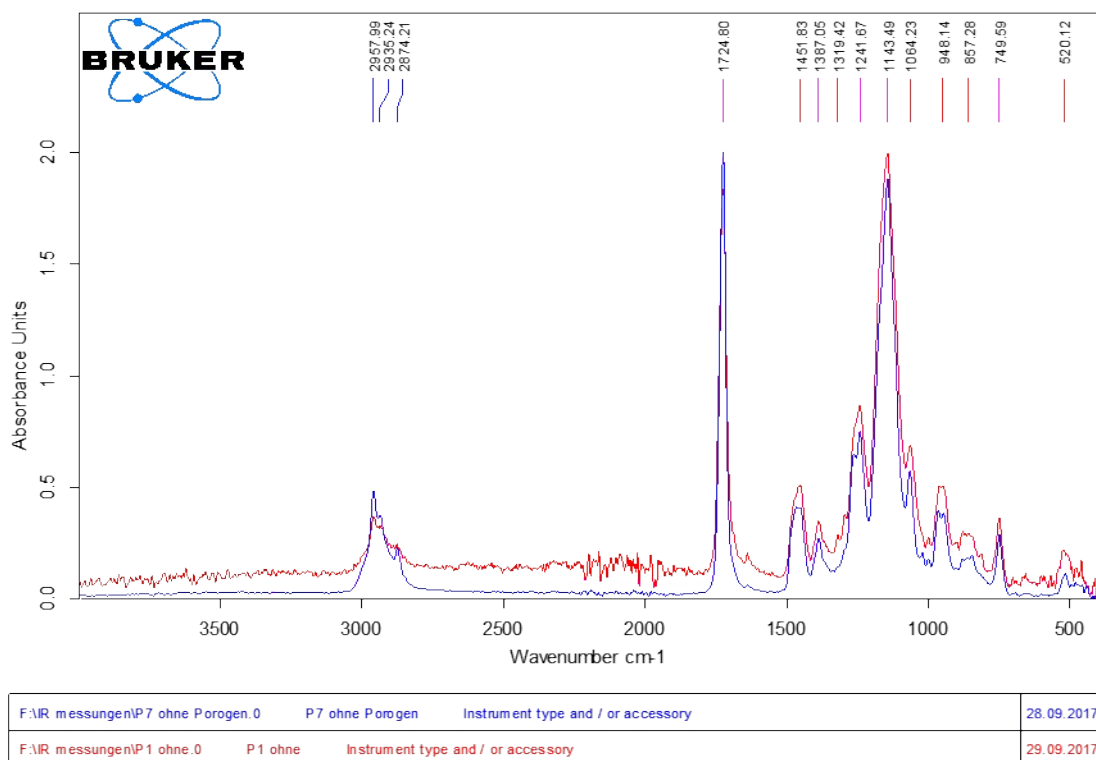

Supplementary 1: IR spectra of Monolith I and monolith II

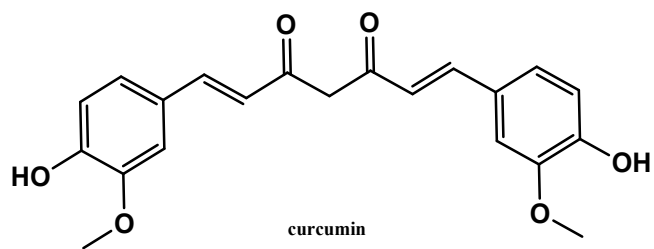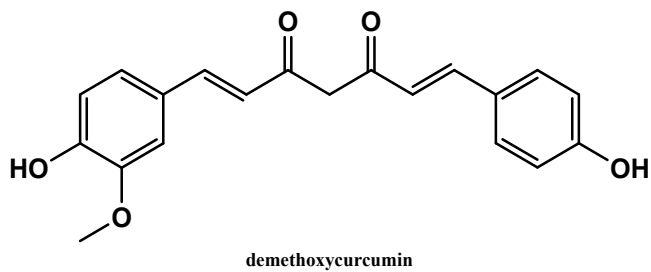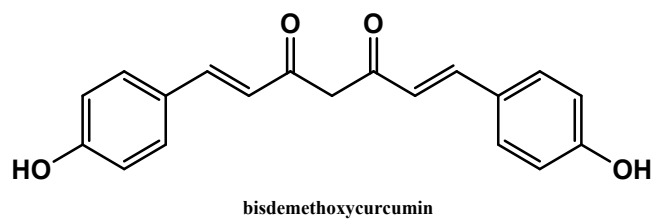

Supplementary 2: Chemical Structure of curcuminoids
